# Supplementary material for: Preparation of Au–Ag–Pd trimetallic nanoparticles and their application as catalystsElectronic supplementary information (ESI) available: UV-vis spectra and EDX analysis of Au–Ag–Pd colloidal suspensions. See http://www.rsc.org/suppdata/jm/b3/b300952a/
Source: Royal Society of Chemistry journal article supplement (doi:10.1039/b300952a), 2003-03-05
Supplement: b300952a.pdf [file b300952a.pdf]

**J. Mater. Chem. (Communications)**

**Au-Ag-Pd Trimetallic Nanoparticle Preparation and Catalysis Applications**  
**(Electronic Supplementary Information)**

Shu-Hui Tsai, Yi-Hsin Liu, Pei-Lin Wu<sup>\*</sup> and Chen-Sheng Yeh<sup>\*</sup>

*Department of Chemistry*  
*National Cheng Kung University*  
*Tainan, Taiwan 701 R.O.C.*

<sup>\*</sup> Author to whom correspondence should be addressed.

wupl@mail.ncku.edu.tw

csyeh@mail.ncku.edu.tw

**Table 1** The Atomic Ratios (Au/Ag/Pd) Analyzed Using EDX in the Selected Particles, Chosen at Random.

---

| Atomic Ratios (Au/Ag/Pd) of the Selected Particles |                |                |                |                |                |
|----------------------------------------------------|----------------|----------------|----------------|----------------|----------------|
| Irradiation for 25 min                             | 78.9/21.1/0    | 3.5/0/96.5     | 86.7/10.1/3.2  | 60.9/6.1/33.0  | 44.1/7.1/48.8  |
|                                                    | 34.6/15.2/50.2 | 54.8/13.7/31.5 | 41.3/17.7/41.0 | 25.7/25.0/49.3 | 35.2/33.0/31.7 |
| Irradiation for 60 min                             | 40.1/2.6/57.3  | 33.4/14.9/51.7 | 31.2/16.7/52.1 | 44.7/24.0/31.3 | 30.2/28.7/41.1 |
|                                                    | 31.4/39.5/29.1 | 29.6/27.8/42.6 | 30.7/27.1/42.2 | 24.5/24.4/51.1 | 26.1/29.1/44.8 |
|                                                    | 28.4/25.0/46.6 | 23.0/42.6/34.4 | 26.5/48.0/25.5 | 32.2/40.9/26.9 | 35.0/38.1/26.9 |
|                                                    | 23.7/38.9/37.4 | 26.9/46.4/26.7 | 33.3/39.6/27.1 |                |                |

---

## Figure Captions

Figure SI 1: UV-vis absorption spectra development of the colloidal suspensions as a function of the laser exposure time.

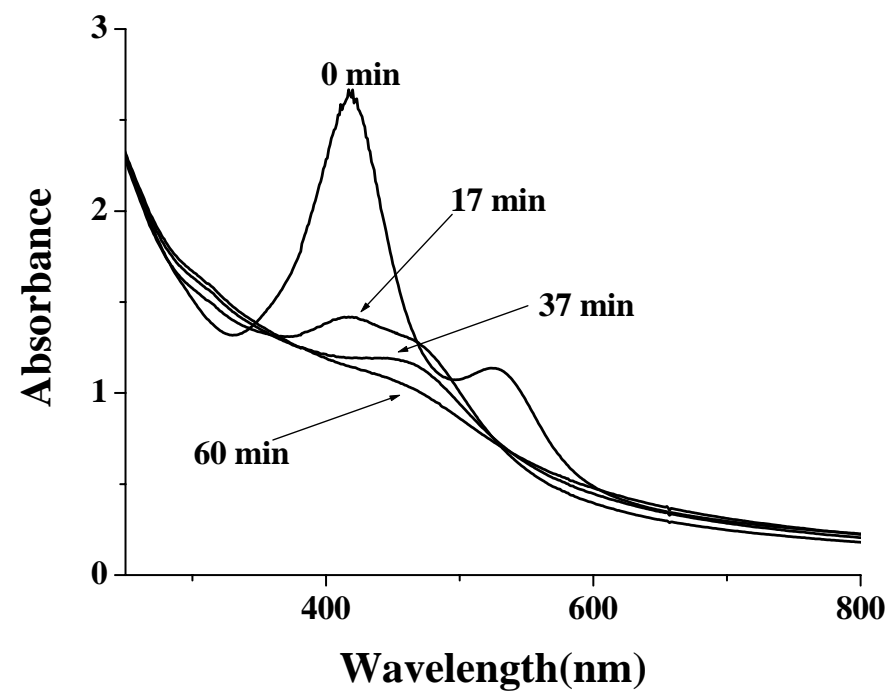

**Figure SI 1**
